# Supplementary material for: Structural transformation of silver( i )–thiolate coordination polymer film at solid–liquid interfaces
Source: Royal Society of Chemistry journal article supplement (doi:10.1039/d4ce01023j), 2024-01-01
Supplement: d4ce01023j1.pdf [file d4ce01023j1.pdf]

## Supplementary Information

### Structural transformation of silver(I)-thiolate coordination polymer film at solid–liquid interfaces

Myu Fukuoka,<sup>†</sup> Yohei Takashima,<sup>†</sup> Kensuke Akamatsu,<sup>†</sup> Aude Demessence,<sup>‡</sup> and  
Takaaki Tsuruoka<sup>\*†</sup>

<sup>†</sup>*Department of Nanobiochemistry, Frontiers of Innovative Research in Science and Technology (FIRST), Konan University, 7-1-20 Minatojima-minami, Chuo-ku, Kobe 650-0047, Japan*

<sup>‡</sup>*Université Claude Bernard Lyon 1, CNRS, Institut de Recherches sur la Catalyse et l'Environnement de Lyon (IRCELYON), UMR 5256, Villeurbanne, France*

#### Contents:

1. Experimental
2. Preparation of  $[\text{Ag}(\text{o-SPhCO}_2\text{H})]_n$  using  $\text{Ag}^+$ -doped polymer substrate
3. Influence of ligand concentrations on ligand exchange rate and surface morphology of the obtained samples
4. Schematic illustration of the crystal conversion by the ligand exchange

## 1. Experimental

**Chemicals.** Potassium hydroxide, silver nitrate, 2-mercaptobenzoic acid, methanol, ethanol, and DMF were purchased from FUJIFILM Wako Pure Chemical Corp. 4-mercaptobenzoic acid was purchased from Tokyo Chemical Industry Co., Ltd. Pyromellitic dianhydride- and oxydianiline-type polyimide films (50  $\mu\text{m}$  thick, Kapton 200H, Toray-Du Pont Co. Ltd.) were used as polymer substrates. The films were cleaned by ultrasonication in ethanol at 25°C for 5 min before use.

**Preparation of  $[\text{Ag}(o\text{-SPhCO}_2\text{H})]_n$  using  $\text{Ag}^+$ -doped polymer substrate.** The polyimide films (1  $\times$  2 cm) were initially immersed into a 5 M aqueous KOH solution at 50°C for 3 min followed by rinsing with distilled water. Next, the modified films were immersed in a 100 mM aqueous  $\text{Ag}(\text{NO}_3)$  solution at 25°C for 20 min. After rinsing with distilled water, the ion-doped polymer films were immersed in an aqueous solution containing *o*-HSPhCOOH (20 mM), transferred to a microwave oven, and heated for 60 min at 180 °C under microwave irradiation (Initiator+; Biotage). The obtained samples were rinsed three times with methanol.

**Ligand exchange from  $[\text{Ag}(o\text{-SPhCO}_2\text{H})]_n$  to  $[\text{Ag}(p\text{-SPhCO}_2\text{H})]_n$  CPs.** The obtained  $[\text{Ag}(o\text{-SPhCO}_2\text{H})]_n$  CP-based films were then immersed into a methanol solution containing *p*-HSPhCOOH (10 mM) and left standing for 120 min at 25 °C. The obtained samples were rinsed three times with methanol.

**Characterization.** The surface morphologies of the obtained films were observed using scanning electron microscopy (SEM; JSM-7001FA, JEOL). X-ray diffraction (XRD) data were collected using a diffractometer (RINT-2200 Ultima IV, Rigaku) with  $\text{Cu K}\alpha$  radiation. The emission spectra were recorded using a spectrofluorometer (FP-6500, Jasco). The ratio of *p*-SPhCOOH to all the ligands (*o*-SPhCOOH and *p*-SPhCOOH) in the crystals was characterized using nuclear magnetic resonance (NMR; JNM-ECA500, JEOL). NMR samples were prepared by immersing the crystal films into the mixture solution containing  $\text{DMSO-d}_6$  (1 mL) and 60% (v/v)  $\text{HNO}_3$  (80  $\mu\text{L}$ ).

## 2. Preparation of $[\text{Ag}(o\text{-SPhCO}_2\text{H})]_n$ using $\text{Ag}^+$ -doped polymer substrate

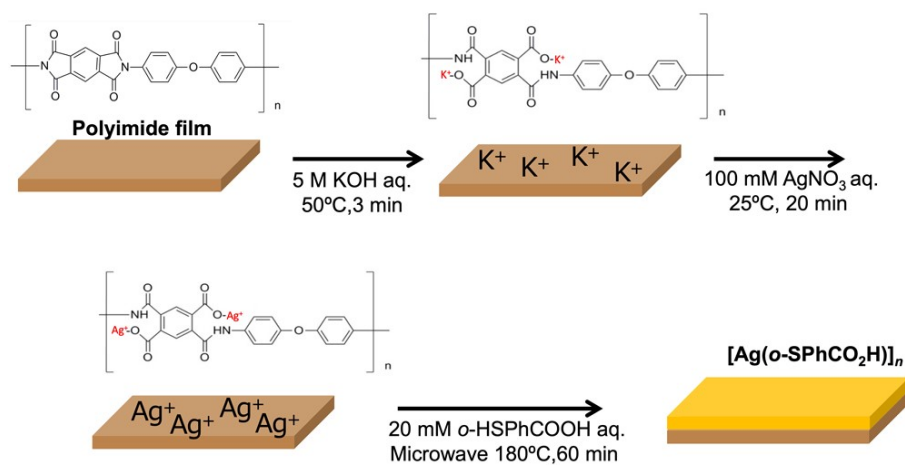

**Scheme S1.** Schematic illustration of the formation of  $[\text{Ag}(o\text{-SPHCO}_2\text{H})]_n$  CPs.

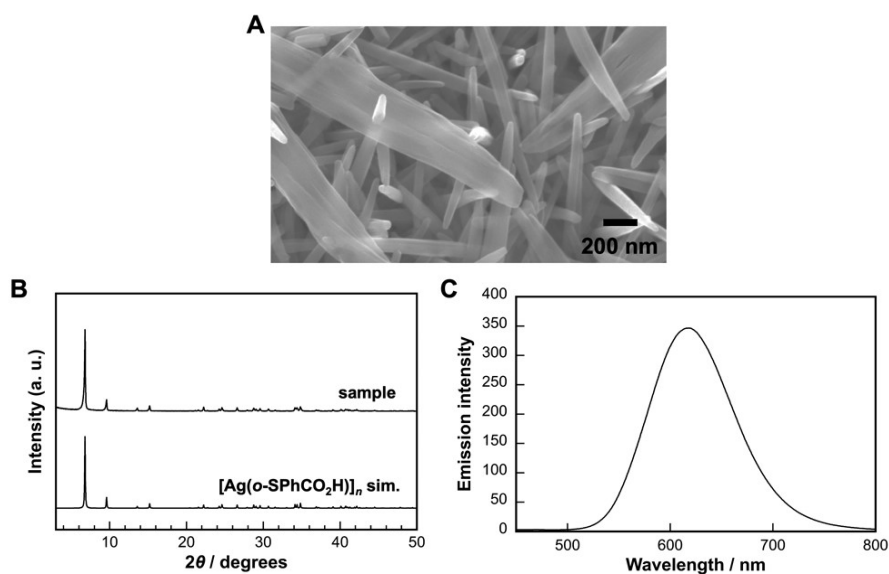

**Figure S1.** (A) SEM image, (B) XRD pattern, and (C) emission spectrum of the obtained samples by microwave irradiation using the  $\text{Ag}^+$ -doped polyimide film.

### 3. Influence of ligand concentrations on ligand-exchange rate and surface morphology of the obtained samples

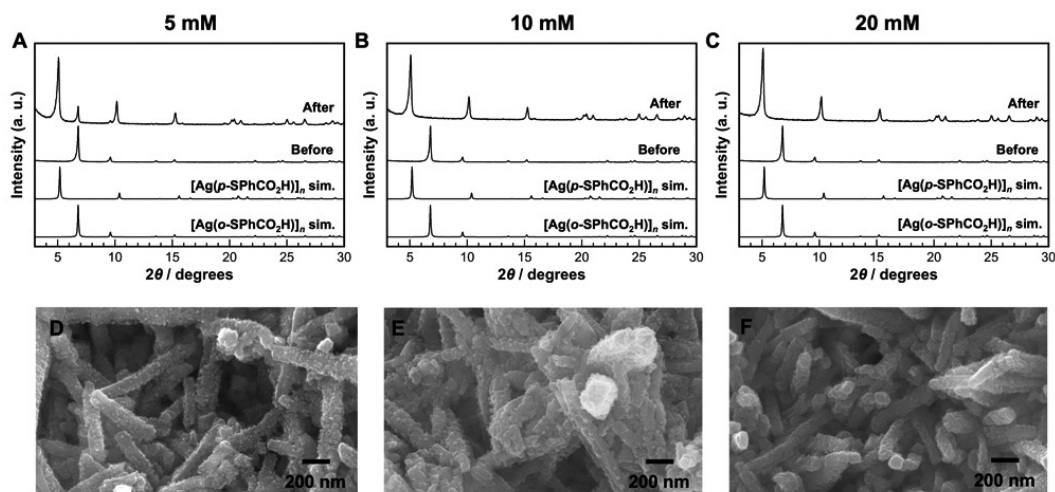

**Figure S2.** (A–C) XRD patterns and (D–F) SEM images of the obtained samples prepared by using ligand exchange solutions containing different ligand concentrations.

### 4. Schematic illustration of the crystal conversion by the ligand exchange

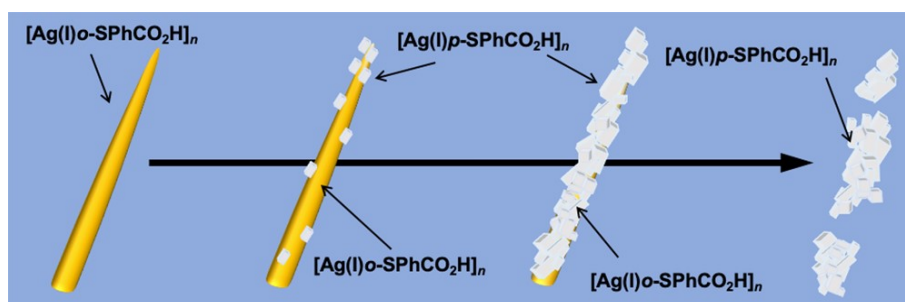

**Scheme S2.** Schematic illustration of the crystal conversion between [Ag(p-SPhCO<sub>2</sub>H)]<sub>n</sub> and [Ag(o-SPhCO<sub>2</sub>H)]<sub>n</sub> CPs by the present approach.
